# Supplementary material for: Colonization of Dogs and Their Owners with Staphylococcus aureus and Staphylococcus pseudintermedius in Households, Veterinary Practices, and Healthcare Facilities
Source: MDPI journal article supplement (doi:10.3390/microorganisms10040677), 2022-03-22
Supplement: s1 [file s1]

**Supplemental Table S3:** Antibiotic resistance phenotypes of *S. aureus* from humans

| Antibiotic resistance phenotypes | Frequency (%) | Resistance against singular antibiotics* | Frequency (%) |
|----------------------------------|---------------|------------------------------------------|---------------|
| <i>Isolates from humans</i>      |               |                                          |               |
| PEN                              | 36 (41.3)     | PEN                                      | 53 (61.0)     |
| PEN, OXA                         | 1 (1.1)       | OXA                                      | 2 (2.3)       |
| PEN, OXA, ERY, CLI, CIP, MOX     | 1 (1.1)       | ERY                                      | 12 (13.8)     |
| PEN, GEN, ERY, CLI, CIP, MOX     | 1 (1.1)       | CLI                                      | 2 (2.3)       |
| PEN, GEN, ERY                    | 1 (1.1)       | GEN                                      | 2 (2.3)       |
| PEN, ERY                         | 7 (8.0)       | TET                                      | 1 (1.1)       |
| PEN, FUS                         | 5 (5.8)       | CIP                                      | 2 (2.3)       |
| PEN, TET                         | 1 (1.1)       | MOX                                      | 2 (2.3)       |
| ERY                              | 2 (2.3)       | FUS                                      | 5 (5.8)       |
| Suceptible                       | 32 (36.8)     |                                          |               |
| <b>Sum</b>                       | <b>87</b>     |                                          |               |
| <i>Isolates from dogs</i>        |               |                                          |               |
| PEN                              | 3             | PEN                                      | 5             |
| PEN, ERY                         | 1             | ERY                                      | 1             |
| PEN, FUS                         | 1             | FUS                                      | 1             |
| Susceptible                      | 8             |                                          |               |
| <b>Sum</b>                       | <b>13</b>     |                                          |               |

\*All of the isolates were susceptible to Rifampicin, (RIF), Linezolid (LIN), Daptomycin (DAP), Trimethoprim-Sulfamethoxazol (SXT), Vancomycin (VAN), Teicoplanin (TEI) und Mupirocin (MUP)

Abbreviations: Penicillin (PEN), Oxacillin (OXA), Fosfomicin (PHO), Gentamicin (GEN), Linezolid (LIN), Erythromycin (ERY), Clindamycin (CLI), Tetracycline (TET), Tigecyklin (TIG), Vancomycin (VAN), Teicoplanin (TEI), Ciprofloxacin (CIP), Moxifloxacin (MOX), Fusidicacid- Sodium (FUS), Rifampicin (RIF), Trimethoprim-Sulfamethoxazol (SXT), Mupirocin (MUP), Cefotaxim (CEF), Daptomycin (DAP)
