# Supplementary material for: Colonization of Dogs and Their Owners with Staphylococcus aureus and Staphylococcus pseudintermedius in Households, Veterinary Practices, and Healthcare Facilities
Source: MDPI journal article supplement (doi:10.3390/microorganisms10040677), 2022-03-22
Supplement: s1 [file s1]

**Supplemental Table S2:** *spa*-typing of *S. aureus* isolates from dogs and humans (cohort I-III)

| <i>spa</i> - types (number of isolates)                                                                        | Attribution to clonal complexes (CC) | Number of isolates | Frequency (%)  |
|----------------------------------------------------------------------------------------------------------------|--------------------------------------|--------------------|----------------|
| <b><i>Isolates from humans</i></b>                                                                             |                                      | <b>87</b>          | <b>100.00%</b> |
| t189 (1), t209 (2)                                                                                             | CC1                                  | 3                  | 3.45%          |
| t002 (1), t8337 (2)                                                                                            | CC5                                  | 3                  | 3.45%          |
| t091 (3), t1867 (1), t2343 (1)                                                                                 | CC7                                  | 5                  | 5.75%          |
| t008 (8), t9325 (1), t1319 (1)                                                                                 | CC8                                  | 10                 | 11.49%         |
| t160 (2)                                                                                                       | CC12                                 | 2                  | 2.30%          |
| t084 (8), t346 (2), t368 (1), t935 (1), t1509 (1), t2696 (1), t4735 (1), t19328 (1)                            | CC15                                 | 16                 | 18.39%         |
| t005 (1), t032 (1), t192 (1), t449 (1), t1709 (1), t2006 (3)                                                   | CC22                                 | 8                  | 9.20%          |
| t021 (2), t122 (1), t789 (1), t1306 (1), t1577 (3), t2509 (1), t6997 (2)                                       | CC30                                 | 11                 | 13.79%         |
| t8270 (1)                                                                                                      | CC34                                 | 1                  | 1.15%          |
| t015 (4), t016 (1), t026 (2), t065 (2), t116 (1), t130 (1), t620 (1), t728 (1), t779 (1), t2045 (4), t2593 (1) | CC45                                 | 19                 | 21.84%         |
| t605 (1)                                                                                                       | CC97                                 | 1                  | 1.15%          |
| t843 (1)                                                                                                       | CC130                                | 1                  | 1.15%          |
| t2778 (3)                                                                                                      | ST133                                | 3                  | 3.45%          |
| t1451(1), t7880 (1)                                                                                            | CC398                                | 3                  | 3.45%          |
| t5890 (1)                                                                                                      | ST1021                               | 1                  | 1.15%          |
| <b><i>Isolates from dogs</i></b>                                                                               |                                      | <b>13</b>          | <b>100.00%</b> |
| t002 (2)                                                                                                       | CC5                                  | 2                  | 15.38%         |
| t008 (1), t935 (1), t9325 (1)                                                                                  | CC8                                  | 3                  | 23.08%         |
| t084 (1), t2696 (1)                                                                                            | CC15                                 | 2                  | 15.38%         |
| t1577 (1), t6997 (1), t7880 (1)                                                                                | CC30                                 | 3                  | 23.08%         |
| t026 (1), t779 (1)                                                                                             | CC45                                 | 2                  | 15.38%         |
| t19469 (1)                                                                                                     | ST425                                | 1                  | 7.69%          |
