# Supplementary material for: Colonization of Dogs and Their Owners with Staphylococcus aureus and Staphylococcus pseudintermedius in Households, Veterinary Practices, and Healthcare Facilities
Source: MDPI journal article supplement (doi:10.3390/microorganisms10040677), 2022-03-22
Supplement: s1 [file s1]

**Table S1: Matching typing characteristics of *S.aureus* from different persons in each of 11 households and thereof derived numbers of transmission**

| Household  | Individual | <i>spa</i> -Type | Antibiotic Resistance Phenotype | Persons with <i>S.aureus</i> with matching characteristics | Number of Transmissions <sup>1</sup> |
|------------|------------|------------------|---------------------------------|------------------------------------------------------------|--------------------------------------|
| 13         | H 62       | t1577            | PEN, ERY                        | 2                                                          | 1                                    |
|            | H 63       | t1577            | PEN, ERY                        |                                                            |                                      |
| 17         | H 76       | t209             | PEN, ERY                        | 2                                                          | 1                                    |
|            | H 77       | t209             | PEN, ERY                        |                                                            |                                      |
| 19         | H 85       | t015             | PEN                             | 2                                                          | 1                                    |
|            | H 86       | t065             | susceptible                     |                                                            |                                      |
|            | H 89       | t015             | PEN                             |                                                            |                                      |
| 24         | H 107      | t084             | susceptible                     | 2                                                          | 1                                    |
|            | H 108      | t084             | susceptible                     |                                                            |                                      |
| 25         | H 110      | t2006            | susceptible                     | 3                                                          | 2                                    |
|            | H 111      | t2006            | susceptible                     |                                                            |                                      |
|            | H112       | t2006            | susceptible                     |                                                            |                                      |
| 34         | H 157      | t160             | susceptible                     | 2                                                          | 1                                    |
|            | H 158      | t160             | susceptible                     |                                                            |                                      |
| 56         | H 252      | t2045            | PEN                             | 4                                                          | 3                                    |
|            | H 253      | t2045            | PEN                             |                                                            |                                      |
|            | H 254      | t2045            | PEN                             |                                                            |                                      |
|            | H 255      | t2045            | PEN                             |                                                            |                                      |
| 61         | H 281      | t2778            | PEN                             | 3                                                          | 2                                    |
|            | H 282      | t2778            | PEN                             |                                                            |                                      |
|            | H 283      | t2778            | PEN                             |                                                            |                                      |
| 63         | H 292      | t008             | PEN, FUS                        | 2                                                          | 1                                    |
|            | H 293      | t008             | PEN, FUS                        |                                                            |                                      |
| 71         | H318       | t6997            | PEN                             | 2                                                          | 1                                    |
|            | H 319      | t6997            | PEN                             |                                                            |                                      |
| 83         | H 367      | t19328           | susceptible                     | 2                                                          | 1                                    |
|            | H 368      | t19328           | susceptible                     |                                                            |                                      |
| <b>Sum</b> |            |                  |                                 |                                                            | <b>15</b>                            |

<sup>1</sup> No. of transmission = No. of persons carrying *S.aureus* with matching typing characteristics
